# Supplementary material for: The role of the mitochondrial outer membrane protein SLC25A46 in mitochondrial fission and fusion
Source: PubMed Central journal article supplement (PMC10052876; doi:10.26508/lsa.202301914), 2023-03-28
Supplement: LSA-2023-01914_SdataF1_F5.pdf [file LSA-2023-01914_SdataF1_F5.pdf]

# SOURCE DATA – SDS-PAGE

Figure 1

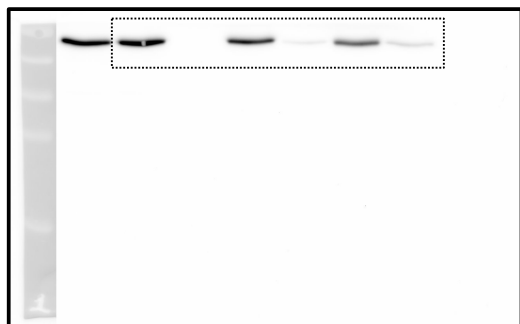

SLC25A46

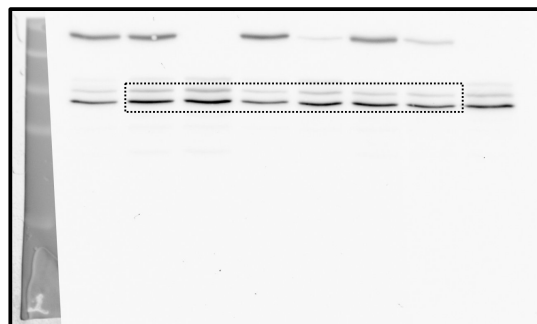

VDAC

Figure 5

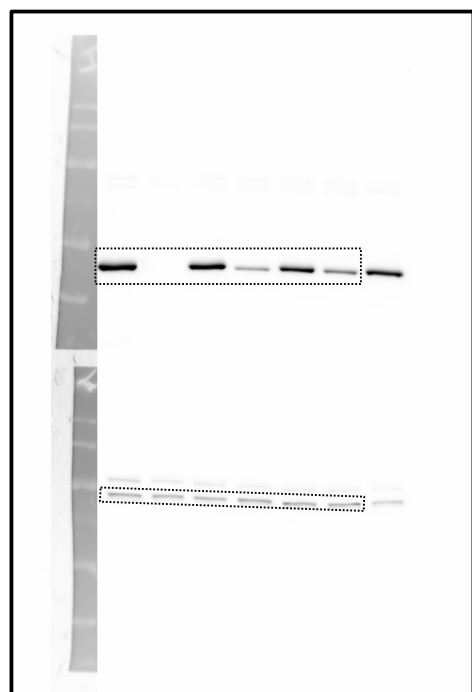

SLC25A46

MFN1

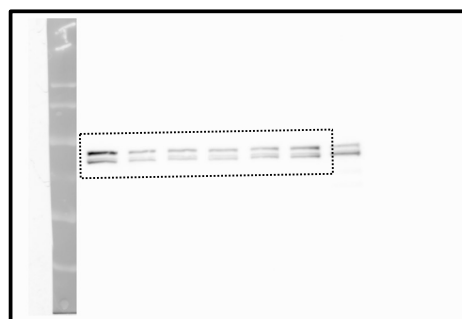

DRP1

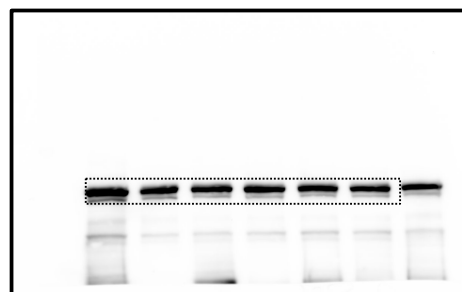

Actin

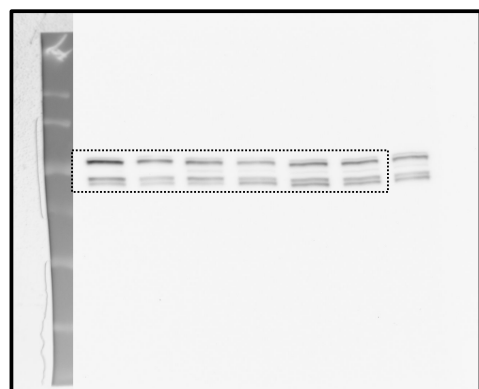

OPA1

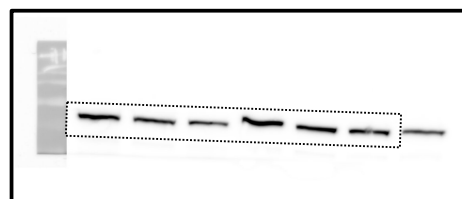

MFN2
